# Supplementary material for: N-Source Determines Barley Productivity, Nutrient Accumulation, and Grain Quality in Cyprus Rainfed Agricultural Systems
Source: MDPI journal article supplement (doi:10.3390/ijerph20053943), 2023-02-23
Supplement: s1 [file s1]

# SUPPLEMENTARY DATA

**Table 1:** Concentration of soil total N, available K and P-Olsen at the beginning of each growing season and before the application of the treatments and seeding the crop. The source of variance was calculated with two-way ANOVA. Different letters denote statistically significant differences between the mean concentration within each growing season based on TukeyHSD at  $p<0.05$

| Growing season     | Nitrogen management             | Total N (mg/g) | K (ppm)      | P-Olsen (ppm) |
|--------------------|---------------------------------|----------------|--------------|---------------|
| 2016-2017          | Control                         | 0.91±0.12 a    | 200.1±11.8 a | 25.5±4.9 a    |
|                    | Compost                         | 1.12±0.14 a    | 215.4±12.3 a | 27.3±3.8 a    |
|                    | NH <sub>4</sub> NO <sub>3</sub> | 0.98 ±0.11 a   | 210.5±15.4 a | 25.6±5.4 a    |
|                    | Manure                          | 0.92±0.09 a    | 221.8±9.6 a  | 26.4±3.3 a    |
| 2017-2018          | Control                         | 0.89±0.09 a    | 210.3±12.7 a | 20.7±5.4 a    |
|                    | Compost                         | 0.98±0.11 a    | 205.6±22.7 a | 34.2±7.8 a    |
|                    | NH <sub>4</sub> NO <sub>3</sub> | 0.93±0.09 a    | 199.1±38.5 a | 22.6±4.6 a    |
|                    | Manure                          | 1.21±0.12 a    | 208.4±23.7 a | 31.3±6.9 a    |
| 2017-2018          | Control                         | 0.92±0.09 a    | 214.6±23.7 a | 19.5±5.3 a    |
|                    | Compost                         | 1.42±0.11 a    | 235.7±35.1 a | 29.4±4.8 a    |
|                    | NH <sub>4</sub> NO <sub>3</sub> | 1.12±0.13 a    | 220.9±18.3 a | 24.2±3.6 a    |
|                    | Manure                          | 1.26±0.14 a    | 245.6±26.4 a | 27.9±2.8 a    |
| Source of Variance |                                 |                |              |               |
| Growing season     |                                 | ns             | ns           | ns            |
| N-management       |                                 | ns             | ns           | ns            |
| Interaction        |                                 | ns             | ns           | ns            |

Climograph - Average values 2016 to 2019

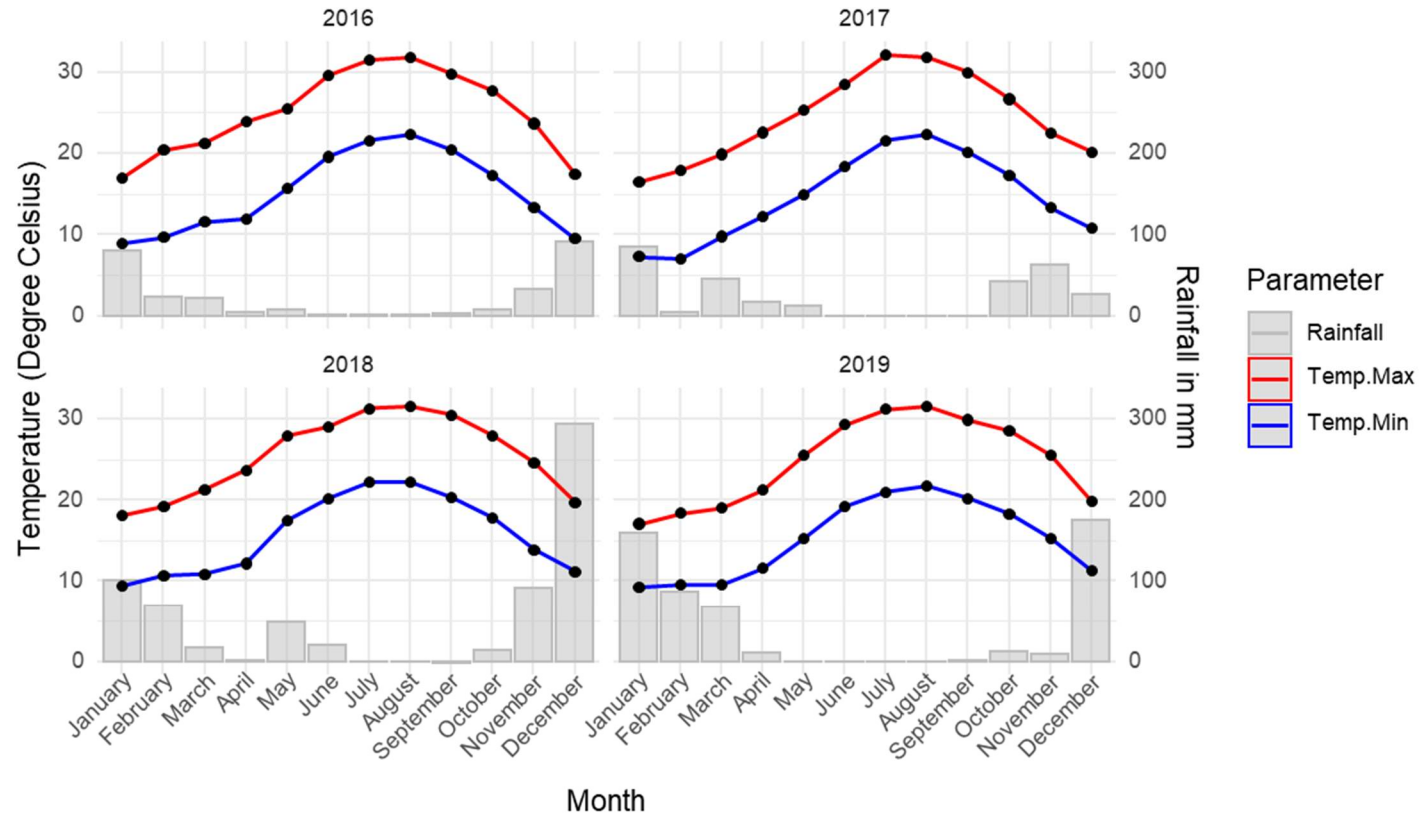

lavaan 0.6-12 ended normally after 89 iterations

|                            |        |
|----------------------------|--------|
| Estimator                  | ML     |
| Optimization method        | NLMINB |
| Number of model parameters | 24     |

|                        |     |
|------------------------|-----|
| Number of observations | 108 |
|------------------------|-----|

Model Test User Model:

|                      |        |
|----------------------|--------|
| Test statistic       | 61.352 |
| Degrees of freedom   | 30     |
| P-value (Chi-square) | 0.001  |

Parameter Estimates:

|                                  |            |
|----------------------------------|------------|
| Standard errors                  | Standard   |
| Information                      | Expected   |
| Information saturated (h1) model | Structured |

Latent Variables:

|             |       | Estimate | Std.Err | z-value | P(> z ) | Std.lv | Std.all |
|-------------|-------|----------|---------|---------|---------|--------|---------|
| Nitrogen =~ |       |          |         |         |         |        |         |
| TKN_GR      | (I1)  | 1.000    |         |         |         | 0.995  | 1.000   |
| TKN_HAY     | (I2)  | 0.455    | 0.177   | 2.569   | 0.010   | 0.343  | 0.345   |
| macro =~    |       |          |         |         |         |        |         |
| Ca          | (I3)  | 1.000    |         |         |         | 0.146  | 0.177   |
| Mg          | (I4)  | 2.336    | 2.121   | 1.101   | 0.271   | 0.342  | 0.274   |
| micro =~    |       |          |         |         |         |        |         |
| Cu          | (I5)  | 1.000    |         |         |         | 0.432  | 0.443   |
| Zn          | (I6)  | 2.028    | 0.462   | 4.388   | 0.000   | 0.877  | 0.871   |
| Mn          | (I7)  | 1.245    | 0.335   | 3.720   | 0.000   | 0.538  | 0.541   |
| Fe          | (I8)  | 0.854    | 0.287   | 2.975   | 0.003   | 0.369  | 0.379   |
| Prod =~     |       |          |         |         |         |        |         |
| Yield       | (I9)  | 1.000    |         |         |         | 0.920  | 0.926   |
| Straw       | (I10) | 1.058    | 0.109   | 9.689   | 0.000   | 0.973  | 0.980   |

Regressions:

|            |      | Estimate | Std.Err | z-value | P(> z ) | Std.lv | Std.all |
|------------|------|----------|---------|---------|---------|--------|---------|
| Nitrogen ~ |      |          |         |         |         |        |         |
| Nsrc       | (a1) | 0.470    | 0.085   | 5.532   | 0.000   | 0.472  | 0.470   |
| macro ~    |      |          |         |         |         |        |         |
| Nsrc       | (a2) | 0.104    | 0.090   | 1.167   | 0.243   | 0.714  | 0.710   |
| micro ~    |      |          |         |         |         |        |         |
| Nsrc       | (a3) | 0.363    | 0.083   | 4.366   | 0.000   | 0.840  | 0.836   |
| Prod ~     |      |          |         |         |         |        |         |
| Nsrc       | (a4) | 0.032    | 1.392   | 0.023   | 0.981   | 0.035  | 0.035   |
| micro      | (a6) | -0.854   | 0.529   | -1.613  | 0.107   | -0.401 | -0.401  |
| macro      | (a7) | 3.485    | 13.023  | 0.268   | 0.789   | 0.555  | 0.555   |
| Nitrogen   | (a8) | 0.298    | 0.096   | 3.095   | 0.002   | 0.322  | 0.322   |

Variances:

|           | Estimate | Std.Err | z-value | P(> z ) | Std.lv | Std.all |
|-----------|----------|---------|---------|---------|--------|---------|
| .TKN_GR   | 0.000    |         |         |         | 0.000  | 0.000   |
| .Ca       | 0.969    | 0.138   | 7.034   | 0.000   | 0.969  | 0.978   |
| .Mg       | 0.874    | 0.248   | 3.522   | 0.000   | 0.874  | 0.882   |
| .Cu       | 0.804    | 0.113   | 7.092   | 0.000   | 0.804  | 0.811   |
| .Zn       | 0.222    | 0.078   | 2.831   | 0.005   | 0.222  | 0.224   |
| .Mn       | 0.701    | 0.102   | 6.885   | 0.000   | 0.701  | 0.708   |
| .Fe       | 0.854    | 0.119   | 7.173   | 0.000   | 0.854  | 0.862   |
| .Yield    | 0.140    | 0.082   | 1.720   | 0.085   | 0.140  | 0.142   |
| .Straw    | 0.038    | 0.089   | 0.427   | 0.669   | 0.038  | 0.039   |
| .Nitrogen | 0.772    | 0.105   | 7.348   | 0.000   | 0.779  | 0.779   |
| .macro    | 0.011    | 0.041   | 0.261   | 0.794   | 0.495  | 0.495   |
| .micro    | 0.056    | 0.028   | 1.992   | 0.046   | 0.301  | 0.301   |
| .Prod     | 0.557    | 0.520   | 1.069   | 0.285   | 0.658  | 0.658   |

R-Square:

|          | Estimate |
|----------|----------|
| TKN_GR   | 1.000    |
| Ca       | 0.022    |
| Mg       | 0.118    |
| Cu       | 0.189    |
| Zn       | 0.776    |
| Mn       | 0.292    |
| Fe       | 0.138    |
| Yield    | 0.858    |
| Straw    | 0.961    |
| Nitrogen | 0.371    |
| macro    | 0.792    |
| micro    | 0.711    |
| Prod     | 0.472    |

Defined Parameters:

|               | Estimate | Std.Err | z-value | P(> z ) | Std.lv | Std.all |
|---------------|----------|---------|---------|---------|--------|---------|
| nitrogen_a1a8 | 0.140    | 0.052   | 2.701   | 0.007   | 0.152  | 0.152   |
| macro_a2a7    | 0.364    | 1.378   | 0.264   | 0.792   | 0.396  | 0.394   |
| micro_a3a6    | -0.310   | 0.187   | -1.656  | 0.098   | -0.337 | -0.336  |
